# Supplementary material for: Removal of Indium Ions from Aqueous Solutions Using Hydroxyapatite and Its Two Modifications
Source: MDPI journal article supplement (doi:10.3390/separations10070401), 2023-07-12
Supplement: s1 [file s1]

Archive with 1 entries (1 files):
- separations-2487154-supplementary.pdf
