# Supplementary figures and images for: Removal of Indium Ions from Aqueous Solutions Using Hydroxyapatite and Its Two Modifications
Source: MDPI journal article supplement (doi:10.3390/separations10070401), 2023-07-12

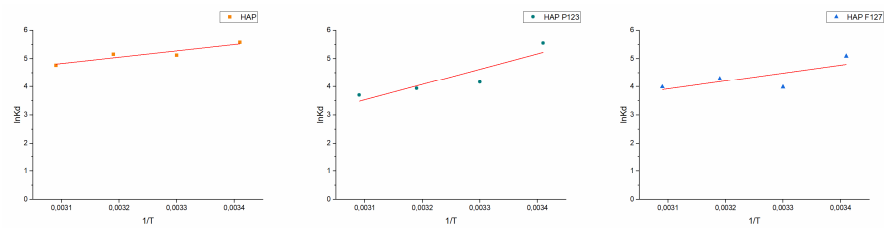

Figure S1:  $\ln K_d$  vs.  $1/T$

Supplement: s1 [file s1 › separations-2487154-supplementary.pdf]
